# Supplementary material for: Advancing lithium–sulfur battery efficiency: utilizing a 2D/2D g-C3N4@MXene heterostructure to enhance sulfur evolution reactions and regulate polysulfides under lean electrolyte conditions
Source: Royal Society of Chemistry journal article supplement (doi:10.1039/d4mh00200h), 2024-01-01
Supplement: d4mh00200h1.pdf [file d4mh00200h1.pdf]

## Electronic Supplementary Information for

### **Advancing Lithium-Sulfur Battery Efficiency: Utilizing a 2D/2D g-C<sub>3</sub>N<sub>4</sub>@MXene Heterostructure to Enhance Sulfur Evolution Reactions and Regulate Polysulfides in Lean Electrolyte Conditions**

Vijay K. Tomer<sup>a,\*</sup>, Otavio Augusto Tilton Dias<sup>a</sup>, Abdelaziz M. Gouda<sup>b</sup>, Ritu Malik<sup>a,\*</sup>, Mohini Sain<sup>a,\*</sup>

<sup>a</sup> Department of Mechanical & Industrial Engineering, University of Toronto, Toronto, Canada,

<sup>b</sup> Solar Fuels Group, Department of Chemistry, University of Toronto, Toronto, Canada

\*Corresponding author: [vj.kumar@utoronto.ca](mailto:vj.kumar@utoronto.ca); [ritu.kumar@utoronto.ca](mailto:ritu.kumar@utoronto.ca), [m.sain@utoronto.ca](mailto:m.sain@utoronto.ca)

**Table S1:** Results obtained from Nyquist plot for fresh and cycled cells.

| Electrode                             | Condition        | $R_e$ | $R_{ct}$ |
|---------------------------------------|------------------|-------|----------|
| g-C <sub>3</sub> N <sub>4</sub> -MX/S | Fresh cell       | 4.0   | 34.9     |
|                                       | After 190 cycles | 4.9   | 30.1     |
| g-C <sub>3</sub> N <sub>4</sub> /S    | Fresh cell       | 8.1   | 58.3     |
|                                       | After 105 cycles | 8.6   | 45.7     |

**Table S2:** Comparison of Li-S battery performance with previously published works.

| Host material                                              | Specific surface area (m <sup>2</sup> /g) | Sulfur content (%) | Initial capacity (mAh/g) <sup>a</sup> | Retained capacity (mAh/g) <sup>b</sup> | Rate       | Cycle number | Capacity retention (%) = $\frac{b}{a} \times 100$ | Ref       |
|------------------------------------------------------------|-------------------------------------------|--------------------|---------------------------------------|----------------------------------------|------------|--------------|---------------------------------------------------|-----------|
| g-C <sub>3</sub> N <sub>4</sub> nanosheets                 | 209                                       | 70.4               | 870                                   | 578                                    | 0.5 C      | 750          | 66.43                                             | 1         |
| g-C <sub>3</sub> N <sub>4</sub> spheres                    | 931                                       | 69.8               | 934                                   | 775                                    | 0.5 C      | 100          | 82.97                                             | 2         |
| Porous g-C <sub>3</sub> N <sub>4</sub>                     | 83                                        | 68.67              | 734                                   | 620                                    | 1 C        | 300          | 84.46                                             | 3         |
| g-C <sub>3</sub> N <sub>4</sub> /C porous cages            | 428                                       | 67                 | 1240                                  | 729                                    | 1 C        | 200          | 58.79                                             | 4         |
| Hierarchically porous g-C <sub>3</sub> N <sub>4</sub> /C   | 498                                       | 64.5               | 1150                                  | 1128                                   | 0.2 C      | 100          | 98.08                                             | 5         |
| 3D porous g-C <sub>3</sub> N <sub>4</sub> /graphene sponge | 827                                       | 731                | 1132                                  | 974                                    | 0.2 C      | 800          | 86.04                                             | 6         |
| 3D porous g-C <sub>3</sub> N <sub>4</sub> /CNT             | 202                                       | 80                 | 1023                                  | 583                                    | 1 C        | 500          | 56.98                                             | 7         |
| 3D g-C <sub>3</sub> N <sub>4</sub> /rGO/CNT microspheres   | 225                                       | 70.8               | 730                                   | 620                                    | 1 C        | 500          | 84.93                                             | 8         |
| <b>g-CN + MXene</b>                                        | <b>54</b>                                 | <b>69.5</b>        | <b>1061</b>                           | <b>73</b>                              | <b>C/8</b> | <b>190</b>   | <b>73</b>                                         | This work |

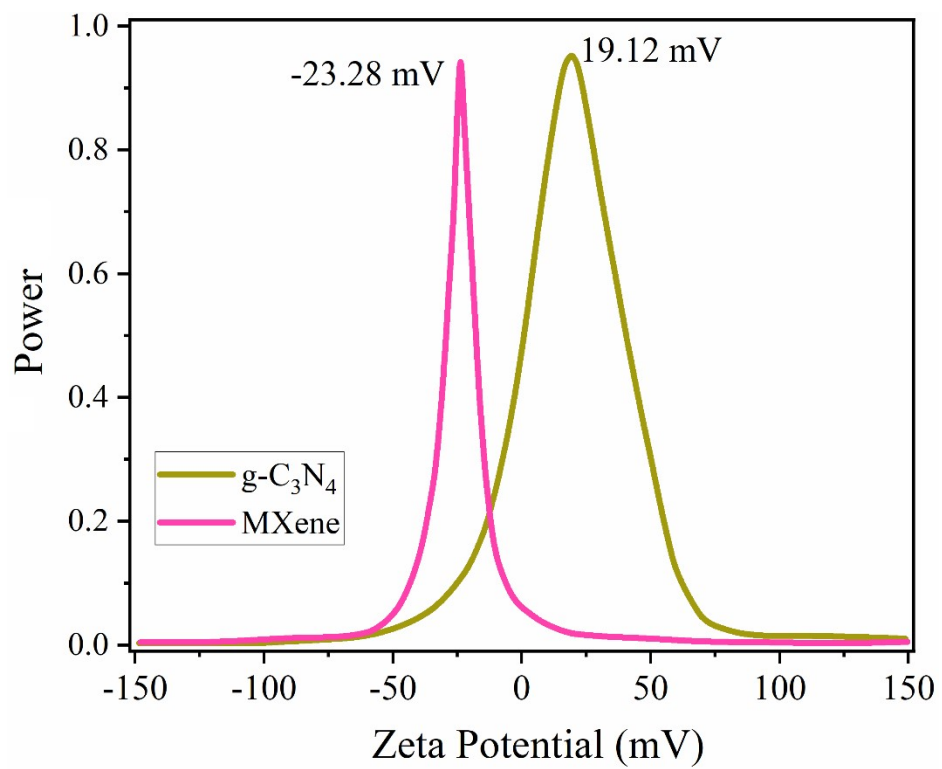

**Figure S1:** Zeta potential value of pure g-C<sub>3</sub>N<sub>4</sub> nanosheets and MXene nanosheets.

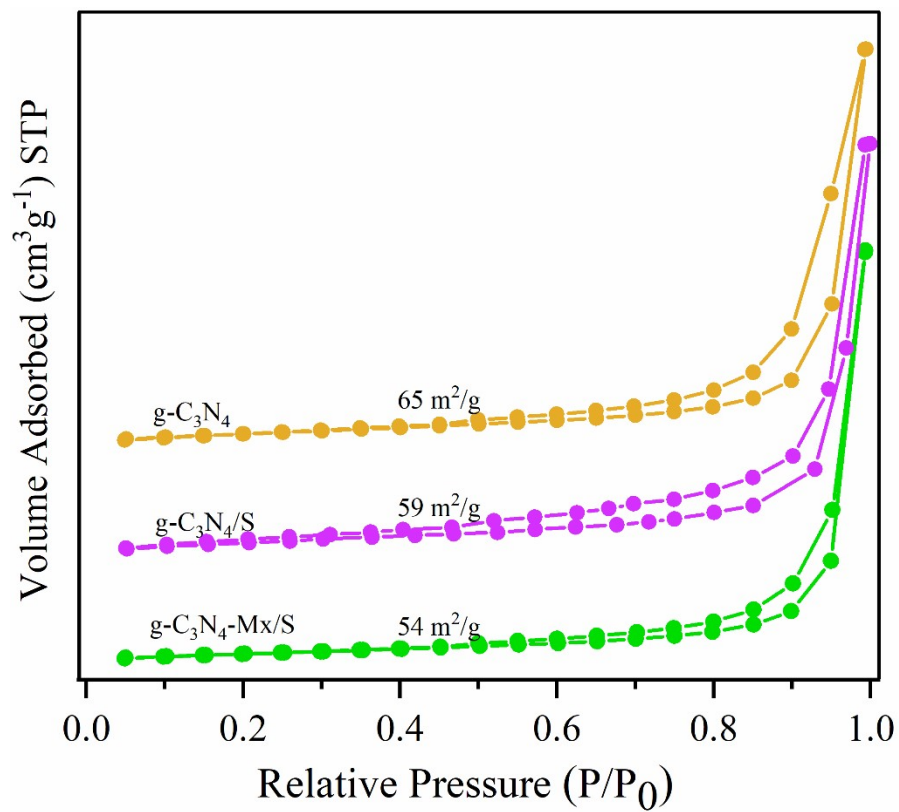

**Figure S1:** N<sub>2</sub> sorption isotherms for the as-prepared materials.

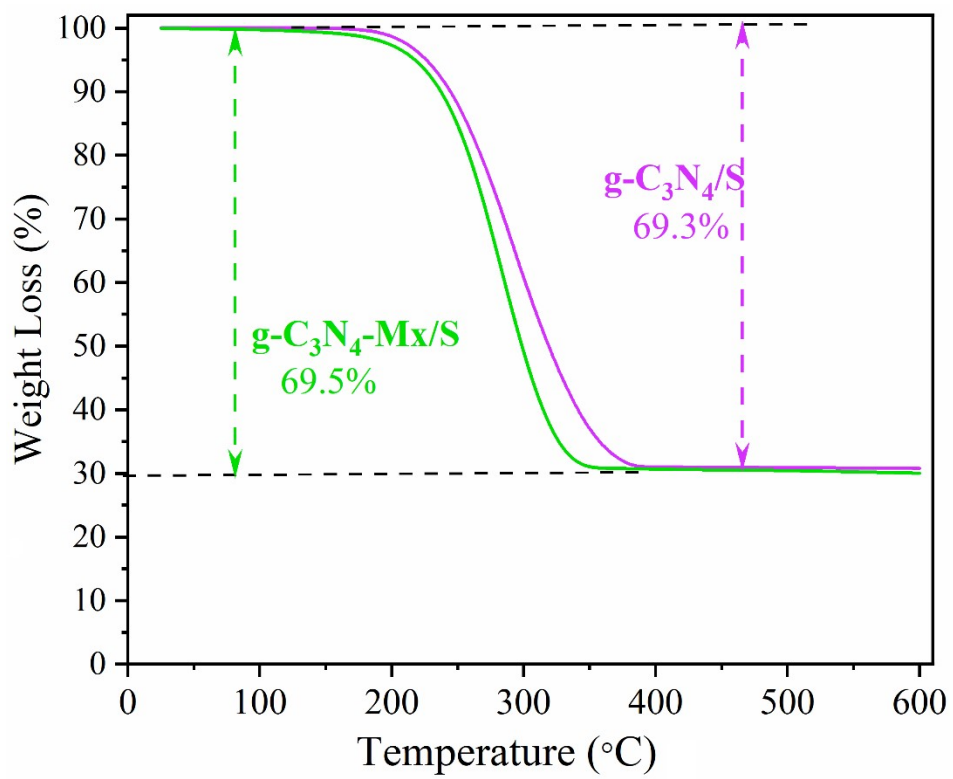

**Figure S3:** TGA profile of sulfur-based composite.

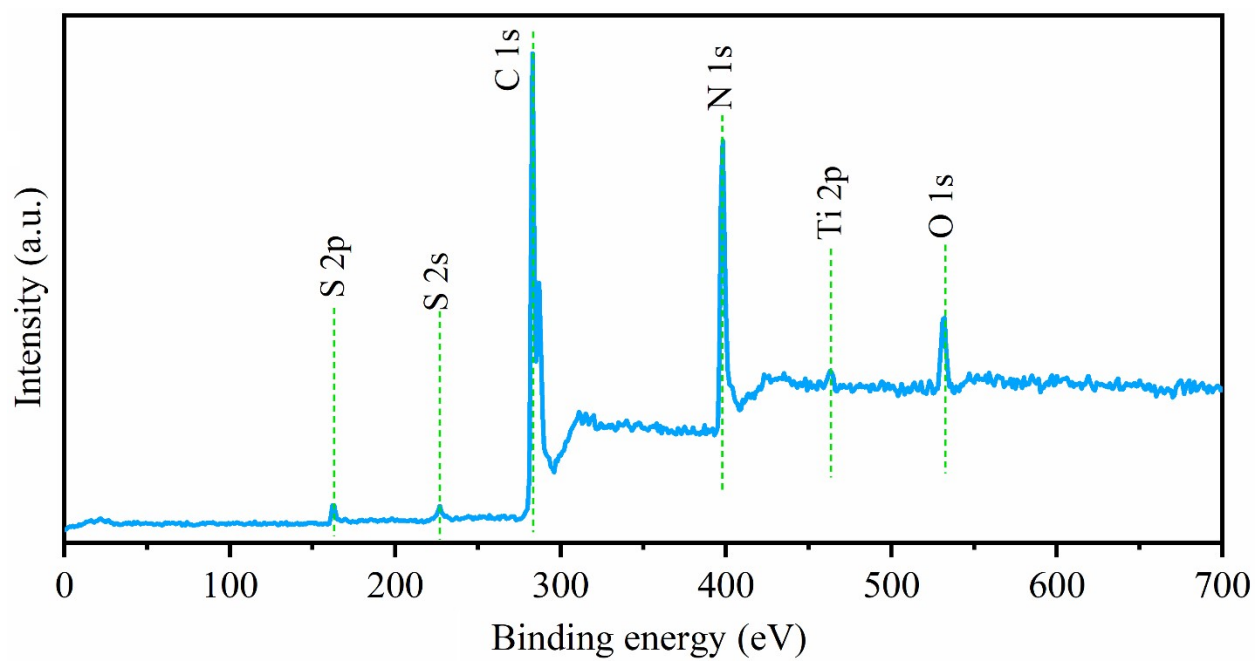

**Figure S4:** XPS survey scan for g-C<sub>3</sub>N<sub>4</sub>-Mx/S composite.

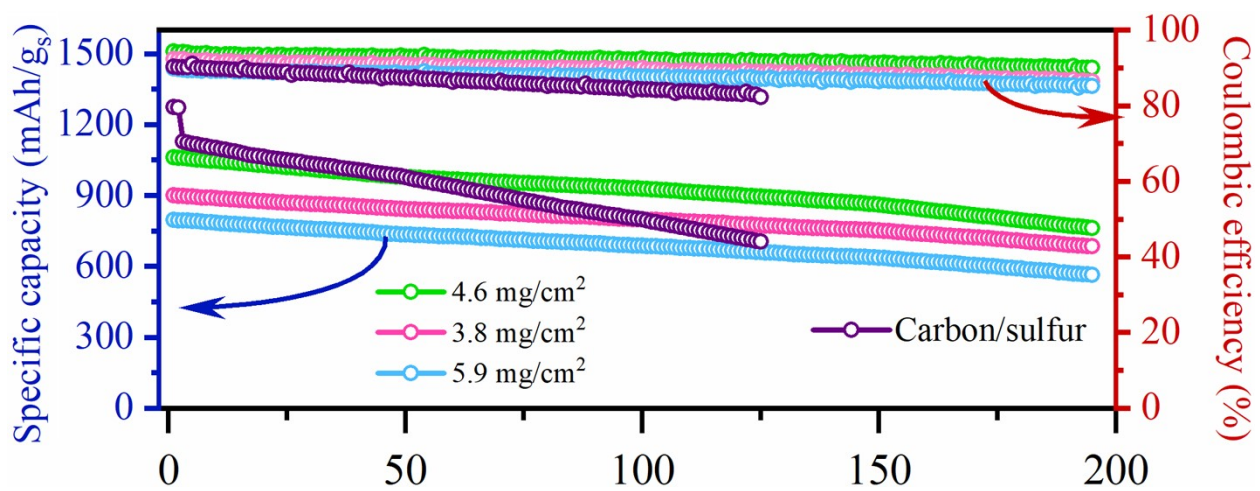

**Figure S5:** Cycle performance of the g-C<sub>3</sub>N<sub>4</sub>-Mx/S cathode with varied sulfur loading for 190 cycles at C/8.

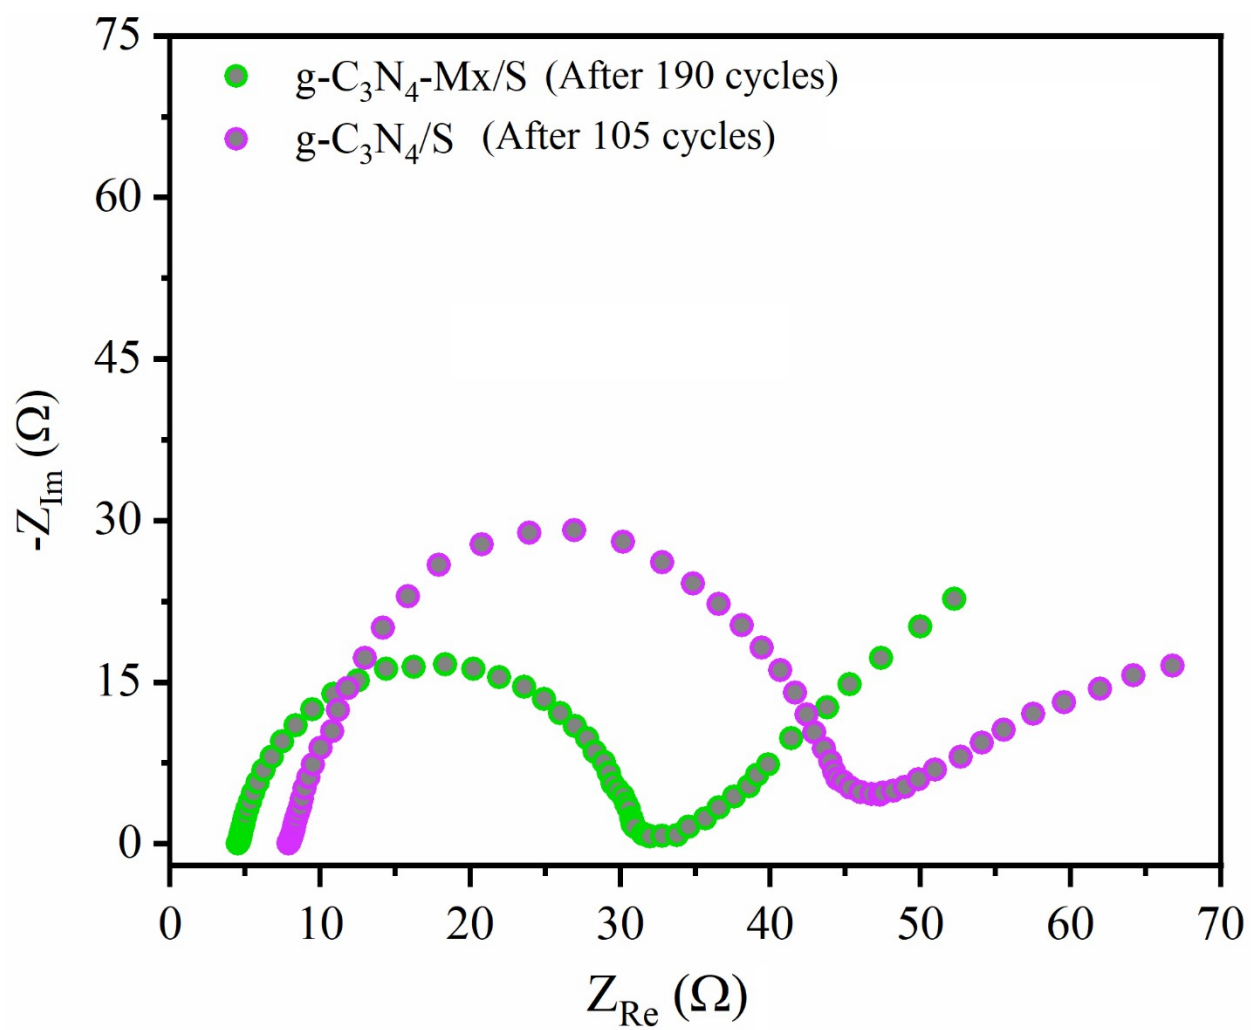

**Figure S6:** EIS spectra of  $g-C_3N_4-Mx/S$  cathode extracted from the pouch cell after 190 charge-discharge cycles.



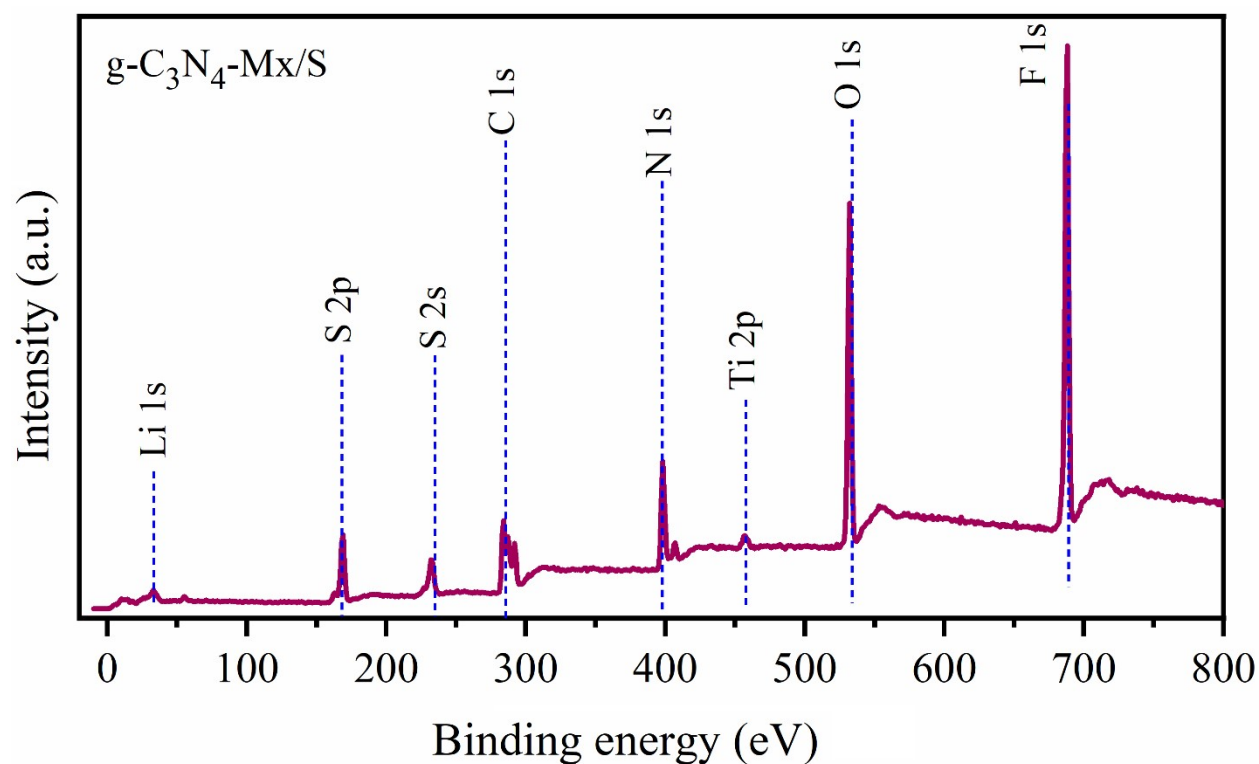

**Figure S7:** Complete XPS scan spectrum of the g-C<sub>3</sub>N<sub>4</sub>-Mx/S cathode obtained from the pouch cell cycled for 190 charge-discharge cycles.

#### References:

- 1 Z. Meng, Y. Xie, T. Cai, Z. Sun, K. Jiang and W. Q. Han, *Electrochimica Acta*, 2016, **210**, 829–836.
- 2 Z. Meng, S. Li, H. Ying, X. Xu, X. Zhu and W. Q. Han, *Advanced Materials Interfaces*, 2017, **4**, 1601195.
- 3 D. Li, J. Liu, W. Wang, S. Li, G. Yang, P. Wang, K. Zhu and Z. Li, *Applied Surface Science*, 2021, **569**, 151058.
- 4 P. Song, Z. Chen, Y. Chen, Q. Ma, X. Xia and H. Liu, *Electrochimica Acta*, 2020, **363**, 137217.
- 5 X. Hong, Y. Liu, J. Fu, X. Wang, T. Zhang, S. Wang, F. Hou and J. Liang, *Carbon*, 2020, **170**, 119–126.
- 6 J. Zhang, J. Y. Li, W. P. Wang, X. H. Zhang, X. H. Tan, W. G. Chu and Y. G. Guo, *Advanced Energy Materials*, 2018, **8**, 1702839.
- 7 W. He, X. He, M. Du, S. Bie, J. Liu, Y. Wang, M. Liu, Z. Zou, W. Yan and H. Zhao, *Journal of Physical Chemistry C*, 2019, **123**, 15924–15934.
- 8 J. Wang, Z. Meng, W. Yang, X. Yan, R. Guo and W. Q. Han, *ACS Applied Materials and Interfaces*, 2019, **11**, 819–827.
